# Supplementary material for: Pharmaceutical Pollution and Disposal of Expired, Unused, and Unwanted Medicines in the Brazilian Context
Source: J Xenobiot. 2021 May 18;11(2):61–76. doi: 10.3390/jox11020005 (PMC8162542; doi:10.3390/jox11020005)
Supplement: Supplementary file 1 [file jox-11-00005-s001.zip › jox-1201845-supplementary.pdf]

Supplementary Table 1. Leading issues in Brazilian State laws on overdue drug disposal by regions.

| Regions of Brazil | State Legislation                                                                        | Description                                                                                                                                                                                                                                               |
|-------------------|------------------------------------------------------------------------------------------|-----------------------------------------------------------------------------------------------------------------------------------------------------------------------------------------------------------------------------------------------------------|
| <b>North</b>      |                                                                                          |                                                                                                                                                                                                                                                           |
| Acre              | Law nº 2720 of 07/25/2013                                                                | It creates the State Program for the Collection of Expired or Spoiled Medicines.                                                                                                                                                                          |
| Amapá             | Bill nº 0116/12-AL of 05/23/2012                                                         | It creates the State Program for the Collection of Expired or Spoiled Medicines and provides other measures.                                                                                                                                              |
| Amazonas          | Law nº 3.676 of 12/12/2011                                                               | It creates the State Program for the Collection of Expired or Spoiled Medicines.                                                                                                                                                                          |
|                   | Law nº155 of 07/12/2013                                                                  | It provides for the pharmaceutical industries and drug distribution companies' responsibility to properly dispose of drugs with expired expiration dates and adopt other measures.                                                                        |
| Pará              | ---                                                                                      | ---                                                                                                                                                                                                                                                       |
| Rondônia          | ---                                                                                      | ---                                                                                                                                                                                                                                                       |
| Roraima           | ---                                                                                      | ---                                                                                                                                                                                                                                                       |
| Tocantins         | Bill nº232 of 12/21/2017 and Bill nº68 of 04/20/2017                                     | It obliges pharmacies and drugstores in the State of Tocantins to keep containers for collecting medicines, cosmetics, pharmaceutical supplies, and related items that have deteriorated or have expired and gives other measures.                        |
| <b>Northeast</b>  |                                                                                          |                                                                                                                                                                                                                                                           |
| Alagoas           | Ordinance nº63 of 02/19/2015                                                             | It officializes the disposal and donation of medicines and related products with an expiration date close to expiration.                                                                                                                                  |
| Bahia             | Law nº14123 of 09/12/2019                                                                | It obliges pharmacies and drugstores within the State of Bahia's scope to keep containers for collecting expired medicines, cosmetics, pharmaceutical supplies, and related items and takes other measures.                                               |
| Ceará             | Law nº15934 of 12/29/2015                                                                | It amends article 1 of law nº 15192, of July 19 of 2012, which defines rules for the disposal of expired and/or discontinued drugs.                                                                                                                       |
|                   | Law nº 15192 of 07/19/2012                                                               | It defines rules for the disposal of expired and/or discontinued drugs.                                                                                                                                                                                   |
| Maranhão          | Law nº 11247 of 03/27/2020                                                               | It institutes the State Awareness Campaign for the Correct Disposal of Expired and/or Discontinued Medicines and takes other measures.                                                                                                                    |
|                   | Law nº 9727 of 12/11/2012                                                                | It obliges manufacturers and drug distribution companies to proceed to the selective collection and proper destination of expired drugs, implement an information policy on the risks caused by these products within the State, and take other measures. |
| Paraíba           | Law nº 9646 of 12/29/2011                                                                | It provides for the rules for the final destination of the disposal of expired or unfit medicines for use within the scope of the State of Paraíba, and it provides other measures.                                                                       |
| Piauí             | ---                                                                                      | ---                                                                                                                                                                                                                                                       |
| Pernambuco        | Manual for disposal of solid waste from the State Secretariat for the environment (2017) | Guide consumers on how and where to dispose of solid waste in Pernambuco.                                                                                                                                                                                 |
|                   | Bill nº 596 of 11/16/2015                                                                | It creates the State Medicines Disposal Program, its environmentally appropriate final destination, and takes other measures.                                                                                                                             |
|                   | Bill nº163 of 04/12/2019                                                                 | Within the scope of the State of Pernambuco, it institutes the reverse                                                                                                                                                                                    |

|                     |                                                           |                                                                                                                                                                                                                                                                                                                                              |
|---------------------|-----------------------------------------------------------|----------------------------------------------------------------------------------------------------------------------------------------------------------------------------------------------------------------------------------------------------------------------------------------------------------------------------------------------|
|                     |                                                           | logistics of medicines discarded by the consumer and takes other measures.                                                                                                                                                                                                                                                                   |
| Rio Grande do Norte | Law nº10094 of 08/04/2016                                 | It provides for collecting and disposing of expired medicines in the State of Rio Grande do Norte and provides other measures.                                                                                                                                                                                                               |
| Sergipe             | Law nº7913 of 11/03/2014                                  | Pharmacies and drugstores in the State of Sergipe are obliged to keep containers for collecting medicines, cosmetics, pharmaceutical supplies, and related items damaged or expired.                                                                                                                                                         |
| <b>Midwest</b>      |                                                           |                                                                                                                                                                                                                                                                                                                                              |
| Distrito Federal    | Law nº5092 of 05/04/2013                                  | It provides for the obligation of pharmacies and drugstores to receive expired medicines for disposal.                                                                                                                                                                                                                                       |
| Goiás               | Law nº19462 of 10/11/2016                                 | It provides for the collection and disposal of expired medicines and other measures.                                                                                                                                                                                                                                                         |
| Mato Grosso         | Law nº10600 of 09/26/2017                                 | It obliges pharmacies to receive expired drugs and pharmaceuticals and takes other measures.                                                                                                                                                                                                                                                 |
| Mato Grosso do Sul  | Law nº5180 of 04/12/2018                                  | It amends Law No. 4474 of 03/06/2014.                                                                                                                                                                                                                                                                                                        |
|                     | Law nº4474 of 03/06/2014                                  | It provides pharmacies and drugstores' obligation to keep containers for collecting medicines, cosmetics, and pharmaceutical and related supplies deteriorated or with an expired expiration date.                                                                                                                                           |
| <b>Southeast</b>    |                                                           |                                                                                                                                                                                                                                                                                                                                              |
| Espírito Santo      | Law nº8454 of 04/16/2013                                  | It institutes the "Responsible Disposal" Campaign.                                                                                                                                                                                                                                                                                           |
|                     | Law nº10994 of 05/27/2019*                                | It obliges everyone involved in the pharmaceutical production chain in general to the structure. It implements reverse logistics systems so that these substances and their packaging are directed to the collection in previously established locations, independently of the public service of urban cleaning and solids waste management. |
| Minas Gerais        | ---                                                       | ---                                                                                                                                                                                                                                                                                                                                          |
| Rio de Janeiro      | Bill nº 4147 of 05/29/2018 and Bill nº 1263 of 02/07/2012 | It provides for the collection and disposal of expired or used medicines in the State of Rio de Janeiro and provides other measures.                                                                                                                                                                                                         |
|                     | Law nº 8135 of 10/15/2018                                 | It institutes the state awareness campaign for the correct disposal of expired and/or discontinued drugs.                                                                                                                                                                                                                                    |
| São Paulo           | Law nº12300 of 03/16/2006                                 | It institutes the State Solid Waste Policy and defines principles and guidelines                                                                                                                                                                                                                                                             |
| <b>South</b>        |                                                           |                                                                                                                                                                                                                                                                                                                                              |
| Paraná              | Law nº17211 of 03/07/2012                                 | This law provides for disposing of medicines in disuse in the State of Paraná and its procedures.                                                                                                                                                                                                                                            |
|                     | Decree nº9213 of 10/23/2013                               | It regulates Law No. 17211, of July 3, 2012.                                                                                                                                                                                                                                                                                                 |
| Rio Grande do Sul   | Law nº13905 of 01/10/2012                                 | It provides pharmacies and drugstores' obligation to keep containers for collecting medicines, cosmetics, pharmaceutical supplies, and related items deteriorated or with an expired date.                                                                                                                                                   |
|                     | Law nº15339 of 10/02/2019                                 | It institutes the Solidary Program - Pharmacy Solidarity - awareness, donation, reuse, dispensation for the population and disposal of medicines within the State of Rio Grande do Sul and other measures.                                                                                                                                   |
| Santa Catarina      | Bill nº0056 of 03/10/2016                                 | It institutes the State Policy for Reverse Logistics of Medicines within the State of Santa Catarina's scope.                                                                                                                                                                                                                                |

|                           |                                                                          |
|---------------------------|--------------------------------------------------------------------------|
| Law nº13557 of 11/17/2005 | It provides with the State Solid Waste Policy and adopts other measures. |
|---------------------------|--------------------------------------------------------------------------|

\* Rule with effectively suspended by the Espírito Santo State of Court of Justice, under the justification of Direct Unconstitutionality.

--- No state legislation about the disposal of expired or unused drugs. Sources: Acre, 2013; Amapá, 2012; Amazonas, 2011; Amazonas, 2013; Tocantins, 2017; Alagoas, 2015; Bahia, 2019; Ceará, 2015; Ceará, 2012; Maranhão, 2020; Maranhão, 2012; Paraíba, 2011; Pernambuco, 2015; Secretaria de Meio Ambiente e Sustentabilidade, 2017; Pernambuco, 2019; Pernambuco, 2017; Rio Grande do Norte, 2016; Sergipe, 2014; Distrito Federal, 2013; Goiás, 2016; Mato Grosso, 2018; Mato Grosso, 2014; Espírito Santo, 2013; Espírito Santo, 2019; Rio de Janeiro, 2018; Rio de Janeiro, 2012; São Paulo, 2006; Paraná, 2012; Paraná, 2013; Rio Grande do Sul, 2019; Santa Catarina, 2016; Santa Catarina, 2005.
